# Supplementary material
Source: HighWire-hosted journal article supplement (https://bmjopenquality.bmj.com/content/12/1/e002161)
Supplement: inline-supplementary-material-4 [file inline-supplementary-material-4.pdf]

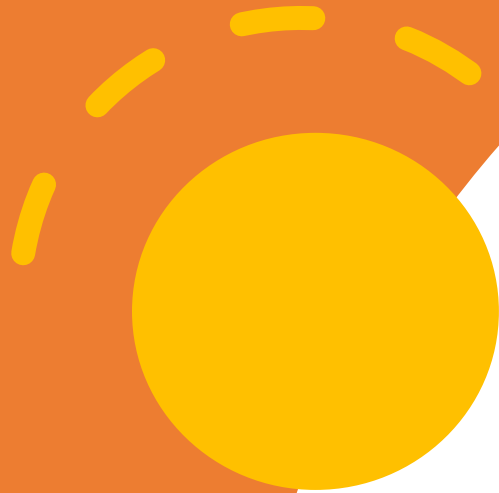

# Why does Delirium matter in post op patients?

# Increased stay.....

## SCIENTIFIC ARTICLES

# Health Economic Implications of Perioperative Delirium in Older Patients After Surgery for a Fragility Hip Fracture

Zywiell, Michael G. MD<sup>1</sup>; Hurley, Richard T. MD<sup>1</sup>; Perruccio, Anthony V. PhD<sup>1</sup>; Hancock-Howard, Rebecca L. PhD<sup>2</sup>; Coyte, Peter C. PhD<sup>2</sup>; Rampersaud, Y. Raja MD<sup>1</sup> [Author Information](#) ✓

The Journal of Bone and Joint Surgery: May 20, 2015 - Volume 97 - Issue 10 - p 829-836  
doi: 10.2106/JBJS.N.00724

**One hundred and sixteen (48%) of the 242 patients developed perioperative delirium during their stay in the hospital.**

**Compared with patients with no delirium, delirium was associated with a mean incremental total length of hospital stay of 7.4 days**

# Increased mortality....

Open Access

Research

## **BMJ Open** Delirium as a predictor of mortality in US Medicare beneficiaries discharged from the emergency department: a national claims-level analysis up to 12 months

---

Juhi Israni, Adriane Lesser, Tyler Kent, Kelly Ko

**Over time, delirium was consistently associated with increased mortality risk compared with controls up to 12 months (HR 2.07; 95% CI 2.01 to 2.13).**

**Covariates that affected mortality included older age, comorbidity and presence of dementia.**

Eur J Vasc Endovasc Surg (2020) 59, 598–605

Common to all specialities...

## Incidence and Risk Factors for Delirium in Elderly Patients with Critical Limb Ischaemia

Joost P. Roijers <sup>a,\*</sup>, Yannick S. Rakké <sup>a</sup>, Cornelis J. Hopmans <sup>a</sup>, Mathijs G. Buimer <sup>a</sup>, Hans G.W. de Groot <sup>a</sup>, Gwan H. Ho <sup>a</sup>,  
Eelco J. Veer <sup>a</sup>, Paul G.H. Mulder <sup>a</sup>, Lijckle van der Laan <sup>a,b</sup>

<sup>a</sup> Department of Surgery, Amphia Hospital Breda, The Netherlands

<sup>b</sup> Department of Cardiovascular Sciences, KU Leuven, Belgium

### Risk factors;

- Age
- Operation time
- WCC >10.0
- Urea > 7.5
- Immobility
- Prior cognitive dysfunction
- Blood transfusions
- Presence of urinary catheter
- Opioid analgesia

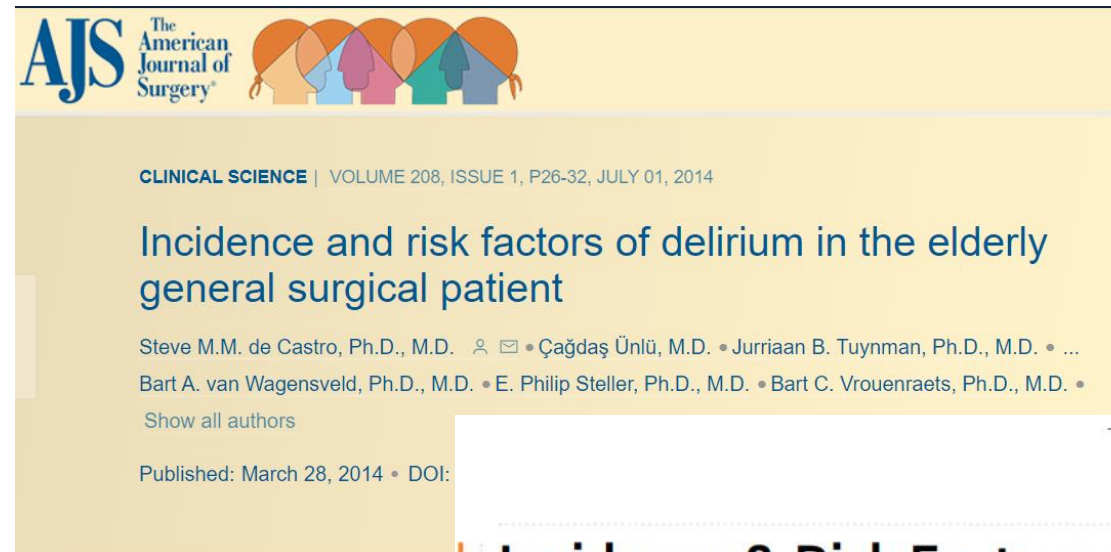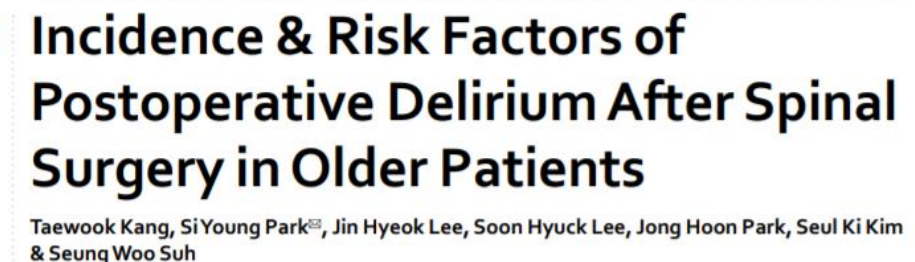

"Doctor. Ms X seems a bit agitated!"

**Box 1** Standard interview questions for researchers with nursing staff to elicit delirium

I have just interviewed\_\_ and I wonder if you could help me form an opinion as to whether he/she has been experiencing delirium or confusion.

1. How many days approximately have you been looking after \_\_?
2. Do you think he/she is delirious or acutely confused?
3. Has there been a sudden change in \_\_'s mental state since coming into hospital?
  - a. If so, when did you notice this change?
4. Do you think he/she is able to focus well when you are talking to him/her or does he/she tend to ramble off the point?
5. Does he/she seem better at any period in the day compared to other times?
6. Has\_\_ 's level of consciousness been altered at all—has he/she been drowsy or not interacting, or perhaps hyperaware at times?

**4AT**

**RAPID CLINICAL TEST FOR  
DELIRIUM**

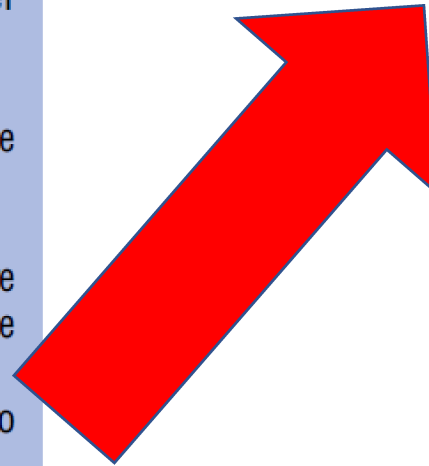

The 4AT is a validated screening tool for delirium- which relates to the  
DSM-V criteria for delirium

ALERTNESS  
AMT4  
ATTENTION  
ACUTE CHANGE

| 4AT tool (circle score in each section on right and total score)                                                                                                                                                                                               |                                                               | Circle |
|----------------------------------------------------------------------------------------------------------------------------------------------------------------------------------------------------------------------------------------------------------------|---------------------------------------------------------------|--------|
| Alertness: this includes patients who are markedly drowsy (e.g. difficult to rouse and/or obviously sleepy during assessment) or agitated/hyperactive. Observe the patient if asleep, attempt to wake. Ask patient to state name and address to assist rating. | Normal (fully alert, but not agitated, throughout assessment) | 0      |
|                                                                                                                                                                                                                                                                | Mild sleepiness for <10 secs after waking then normal         | 0      |
|                                                                                                                                                                                                                                                                | Clearly abnormal                                              | 4      |
| AMT4 (age, D.O.B, place (hospital), current year)                                                                                                                                                                                                              | No mistakes                                                   | 0      |
|                                                                                                                                                                                                                                                                | 1 mistake                                                     | 1      |
|                                                                                                                                                                                                                                                                | ≥2 mistakes/untestable                                        | 2      |
| Attention: Ask the patient: “please tell me the months of the year in backwards order, starting at December.”                                                                                                                                                  | Achieves 7 months or more correctly                           | 0      |
|                                                                                                                                                                                                                                                                | Starts but scores <7 months/refuses to start                  | 1      |
|                                                                                                                                                                                                                                                                | Untestable (cannot start because unwell, drowsy, inattentive) | 2      |
| Acute change or fluctuating course: Evidence of significant change or fluctuation in alertness, cognition, other mental function (e.g. paranoia, hallucinations) arising over the last 2 weeks and still evident in last 24 hours.                             | No                                                            | 0      |
|                                                                                                                                                                                                                                                                | Yes                                                           | 4      |
| Total                                                                                                                                                                                                                                                          |                                                               |        |

DSM-5\*

- The presence of delirium requires all the criteria to be met:
- Disturbance in attention and awareness
  - Disturbance develops acutely and tends to fluctuate in severity
  - At least one additional disturbance in cognition
  - Disturbances are not better explained by a preexisting dementia
  - Disturbances do not occur in the context of a severely reduced level of arousal or coma
  - Evidence of an underlying organic cause or causes

# POST-OPED

## PAIN

## ORAL INTAKE/NUTRITION

## SUGARS

## TESTS

## ORAL HYGIENE

## POST-OP NAUSEA

## ELIMINATION (INC DRAINS)

## DELIRIUM

### ELDERLY PATIENT RETURNED FROM SURGERY?

#### Have they been POST-OPED?

**PAIN-** Are they on appropriate analgesia? Regular/PRNs? What is the source of the pain?

- How much PRN are they using? Would they benefit from a PCA?
- Do they need a pain team review?

**ORAL INTAKE/Nutrition-** Is there a food chart? Do they have IV fluids prescribed? Are they known to dietetics?

- Do they need **Ensures/NG/PEG/TPN**?
- Significant **anaemia**? B12/Folate, Iron studies

**SUGARS-** Are they diabetic? Any Hyper/hypo BMs?

- Review regular insulins and Diabetic drugs.

**TESTS-** What post op investigations have been done?

- **Review the bloods**
  - Any AKI? Any Electrolyte abnormalities?
  - Anaemia?
  - Any cultures/swabs/PCRs awaited?
- Any post op imaging to request/review?
  - Suspect infection? Collections? Drains dislodged?

**ORAL HYGIENE-** Dentures clean? Brushing? Dry/Ulcered lips? Mouth sponges needed?

**POST-OP NAUSEA-** **Anti-emetics prescribed?** Regular? PRN? IV + PO?

- What is the source of the nausea?

**ELIMINATION-**

- Catheter in place? Check their Input/output.
- Retention? Do a bladder scan.
- Review all drain sites. Output? Erythema/pus/pain?
- Bowels moving? Stool Chart, regular laxatives, IV fluids.

**DELIRIUM-** DO A POST-OP 4AT

Compare to their admission 4AT, get a collateral history.
