# Supplementary material
Source: HighWire-hosted journal article supplement (https://bmjopenquality.bmj.com/content/12/1/e002161)
Supplement: inline-supplementary-material-5 [file inline-supplementary-material-5.pdf]

| 4AT tool (circle score in each section on right and total score)                                                                                                                                                                                                |                                                               | Circle |
|-----------------------------------------------------------------------------------------------------------------------------------------------------------------------------------------------------------------------------------------------------------------|---------------------------------------------------------------|--------|
| Alertness: this includes patients who are markedly drowsy (e.g. difficulty to rouse and/or obviously sleepy during assessment) or agitated/hyperactive. Observe the patient, if asleep, attempt to wake. Ask patient to state name and address to assist rating | Normal (fully alert, but not agitated, throughout assessment) | 0      |
|                                                                                                                                                                                                                                                                 | Mild sleepiness for <10 secs after waking then normal         | 0      |
|                                                                                                                                                                                                                                                                 | Clearly abnormal                                              | 4      |
| AMT4 (age, D.O.B., place (hospital), current year)                                                                                                                                                                                                              | No mistakes                                                   | 0      |
|                                                                                                                                                                                                                                                                 | 1 mistake                                                     | 1      |
|                                                                                                                                                                                                                                                                 | ≥ 2 mistakes/untestable                                       | 2      |
| Attention: Ask the patient: "please tell me the months of the year in backwards order, starting at December"                                                                                                                                                    | Achieves 7 months or more correctly                           | 0      |
|                                                                                                                                                                                                                                                                 | Starts but scores <7 months/refuses to start                  | 1      |
|                                                                                                                                                                                                                                                                 | Untestable (cannot start because unwell, drowsy, inattentive) | 2      |
| Acute change or fluctuating course: Evidence of significant change or fluctuation in alertness, cognition, other mental function (e.g. paranoia, hallucinations) arising over the last 2 weeks and still evident in the last 24 hours.                          | No                                                            | 0      |
|                                                                                                                                                                                                                                                                 | Yes                                                           | 4      |
| SCORE 4 OR MORE THIS IS POSSIBLE DELIRIUM +/- COGNITIVE IMPAIRMENT      Total                                                                                                                                                                                   |                                                               |        |
